# Supplementary material for: Functional diversification of the potato R2R3 MYB anthocyanin activators AN1, MYBA1, and MYB113 and their interaction with basic helix-loop-helix cofactors
Source: PubMed Central journal article supplement (PMC4809278; doi:10.1093/jxb/erw014), 2016-02-16
Supplement: supp_erw014_Supplementary_methods.pdf [file supp_erw014_Supplementary_methods.pdf]

## Supplementary methods

### *Gene cloning and sequence analysis*

Full-length coding sequences of three alleles of the potato R2R3 MYB *StANI*, termed as *StANI-R0*, *StANI-R1* and *StANI-R3*, two alleles of the R2R3 MYB *StMYBA1*, termed as *StMYBA-1* and *StMYBA-2*, and three alleles of the R2R3 MYB *StMYB113*, termed as *StMYB113-1*, *StMYB113-2* and *StMYB113-3*, five alleles of *StbHLH1*, termed as *StbHLH1-1*, *StbHLH1-2*, *StbHLH1-3*, *StbHLH1-4* and *StbHLH1-5*, and one allele of *StJAF13* were amplified from cDNA of skin and flesh of four cultivars using Platinum *Taq* DNA Polymerase High Fidelity (Invitrogen, USA) based on the potato *StANI* sequence (AY841129) with primers *StANI-F* and *StANI-R*, *StMYBA1* sequence (JQ219855) with primers *StMYBA1-F* and *StMYBA1-R*, *StMYB113* sequence (OkPScomp56435\_c3\_seq8, KU242748) with primers *StMYB113-F* and *StMYB113-R*, *StbHLH1* sequence (JX848660) with primers *StbHLH1-F* and *StbHLH1-R* and *StJAF13* (HG763862) with primers *StJAF13-F* and *StJAF13-R*. Full-length fragments of *StANI-R0*, *StANI-R1*, *StANI-R3*, *StMYBA-1*, *StMYBA-2*, *StMYB113-1*, *StMYB113-2* and *StMYB113-3* were released from pGEM-T Easy and ligated into the binary vector pSAK277 with a 35S promoter by using *EcoRI* restriction site.

Full-length fragments of *StbHLH1s* and *StJAF13* were ligated into the binary vector pHEX2 with a 35S promoter by using the pENTR Directional TOPO cloning kit. The promoters of potato *DFR* (*Prom-1-StDFR*, 1.792 kb upstream of *DFR*, Genbank: KM873036; *Prom-2-StDFR*, 1.733 kb upstream of *DFR*, Genbank: KM873037; *Prom-3-StDFR*, 1.99 kb upstream of *DFR*, Genbank: KM873038) and *F3'5'H* (2.03kb upstream of *F3'5'H*, Genbank: KM873038) were isolated from the four potato cultivars and inserted into the cloning site of pGreenII 0800-LUC vector and modified to introduce a *NcoI* site at the 3' end of the sequence, allowing the promoter to be cloned as a transcriptional fusion with the firefly luciferase gene (LUC). LUC activity

relative to REN was expressed as a ratio to show activation of the promoter by a transcription factor included in another plasmid.

Clones were confirmed by sequencing (Macrogen, Korea), and the sequences were aligned using Vector NTI (Invitrogen, USA). Sequences for *StANI-R0*, *StANI-R1*, *StANI-R3*, *StMYBA1-1*, *StMYBA1-2*, *StMYB113-1*, *StMYB113-2*, *StbHLH1-2*, *StbHLH1-3*, *StbHLH1-5* and *StJAF13* were submitted to GenBank (the GenBank accession number are KM822778, KM822779, KM822780, KP317177, KP317178, KP317179, KP317180, KP317173, KP317174, KP317175 and KP317176 respectively).

#### *Transient assays of gene function*

The promoters of potato *DFR* and *F3'5'H*, transcription factors *StANI-R0*, *StANI-R1*, *StANI-R3*, *StMYBA1-1*, *StMYBA1-2*, *StMYB113-1*, *StMYB113-2* and *StMYB113-3* in pSAK277, *StbHLH1-1*, *StbHLH1-2*, *StbHLH1-3*, *StbHLH1-4*, *StbHLH1-5* in pHEX2, *StJAF13* in pHEX2 and the negative control GUS in pSAK277 were used in transient assays.

*Nicotiana benthamiana* plants were grown under glasshouse conditions until five to seven leaves were available for infiltration with *Agrobacterium*. Approximately 300µl of *Agrobacterium* culture containing genes of interest was infiltrated at four points into a young leaf. At three days post infiltration, 3 mm leaf discs were cut with a hole-puncher and placed into wells of a 96-well-plate containing 50 µl of PBS (phosphate buffered saline) with 4 replicates from each plant. LUC and REN activities were measured and analyzed by using an VICTOR3 Multilabel Readers (Perkin Elmer, Boston, MA, USA).
