# Supplementary material for: Functional diversification of the potato R2R3 MYB anthocyanin activators AN1, MYBA1, and MYB113 and their interaction with basic helix-loop-helix cofactors
Source: PubMed Central journal article supplement (PMC4809278; doi:10.1093/jxb/erw014), 2016-02-16
Supplement: supp_erw014_Supplementary_Table_S4.pdf [file supp_erw014_Supplementary_Table_S4.pdf]

**Table S4 The sequences of non-functional *StMYB113-3*, *StbHLH1-1* and *StbHLH1-4***

> *StMYB113-3*

ATGAACTTGCCAAGTCATTGGGAGTGAGAAAAGGTTTCATGGACTAAAGAAGAAGATATTCTTTTGAGGAAAT  
GTATTGACAAGTATGGAGAAGGAAAAGTGGCATCTTGTTCTTCTAGAGCTGATGGTCACTTATTGCTGGGAGA  
CTTCCAGGAAGAACAGCAAACGATGTGAAAAATTATTGGAACACACACCTACACAGGAAGTTAATAACCCCTC  
CTCATGAGATACAAGAGAATAAGTACAATAATACCCTCAAGATCACTGAAAGCACTATACTACGACCACGACC  
TCGACCTCGAACCTTCTCAAGTGCAAATAATATTTCTTGGTGCCTAACAATAGTATGATCACAACACATTAG  
ACAAAGATGACGAACAACGCAACAAAGAAATCGTAGTAAATATTTGTGAGAAGCCAACAAGAGAAACAACGT  
CATCGTCTATAGACGATGACGGAGATGGAGTTAAATGGTGGACAGACTTATTGGAAAATTGGAAAGAATTTG  
AGGAAGAAGCAGCAGCAGTATTGAGTTTTGAGGAAGAAAATAAGTTGTTACCAAATTTGTTGTATGAGGAAC  
ATAATCAACAACCATGCAACATGGAGAAAATGATGGTTGGGATGACTTTTCAGTTGATATTGACCTATGGAA  
TCTATTTAATTAG

> *StbHLH1-1*

ATGGAGATTATACAGCCTAATAGCCTGCAGTTACAAAACATGTTGCAGAATCCGTCCAGTCGGTTAAATGGA  
CTTATAGTCTTTTTGGCAATTTGTCCAAAACAAGGGGTGTTAGTGTGGAGAGATGGATATTATAATGGAGC  
TATAAAGACAAGGAAAACGTGCAGCCAATGGAAGTTACTGCTGAAGAAGCTTCGTTTCATAGAAGCCAACA  
ACTTAGAGAACTTTATGATTCACTTTCTGCCGGCGACTCAAATCCGCCGGCGAGAAGGCCGTCCGCAGCCTTG  
TCGCCGGAGGATTTGACGGAATCCGAGTGGTTTTATCTCATGTGTGTTTCTTTCTTTTCTCCACCTATTGGA  
TTACCAGGCAAGGCTTATTCAAAGAAACATCACATATGGATAATGGGTGCAAATGAGGTTGATAGCAAAGTCT  
TCTGTAGAGCTATTCTTGCTAAGAGTGCCCGCATAACAGACTGTCGTTTGTATTCTCTCTTGGACGGTGTAGTG  
GAACTGGGAACTACAGAAAAGGTTCAAGAAGACATTGGATTACATCATGTAAAAAGCTTCTTCAATGAGC  
AACAACAAGCTCAGCCACCAAAGCCAGCTTTATCTGAGCACTCCACTTCGGATCCCGCCGCTTTTCGGAGCCA  
CATTTTTACTCCAGCAATACTCCGTCATCCGCTGGTATTTGTCCAGCGGATCAAGATGGTAGAATTGCTGGAGA  
AGAAGAAAATGAGGATGAGGATGAGGATGAGGACGAGGATGAGGATGACGAAGAAGAAAATGATGAAGTT  
GAATTAGACTCGAATGGTATAGCAATTCAAAGTGTGCTGGGGCGGCTAATCCTATAGCGGCTGAGGCTAGT  
GAGCTCATGCCGCTTGATATGTCTGAACTATACGGCTCGGCTCGCCGATGATGGCTCTAATAATATGGATA  
CTGATTTATATTTGGATGGTATTAGCCAAGCTGGAATACGGCTGACTCTTCAAAGCTGAGACTGCAATTAGT  
TGGGCTAACTTCAAGACCTTCAACATTTAACAGGTGTCCCTAGTTATGATGAATTATCACAAGAAGATGCACA  
TTATTCTCAAACAGTTTCACTGTACTTGAACACCTCTCAAACACAAGTTCCAAATTTGCCTCTTCTACTACCATA  
ATGGGCTCTATTTCTCCTGATTAGCCCAATCCGCTTTACATTATGGCCCATATTTGTAGCCCAAATCCCTCC  
CACTGCCATCGCCAACACGGCGGCGACGGCAGTGGGACCAGCTCCAGTGGCTGCTCAAAGCATACTATTC  
ACTGTCCCATTTCTCCACTACTAAAAAATTACACCAACTACCTGAAGCTCTTTCTCAAAGTCACGAGACTCT  
GCGGCCGACTCTCAGCCGACGCTCTCGATTCCGCAAAGGATGTACGATAAATAGTAGTACACAACAAGAA  
GAGACGAATGGGAACCATGTACTAGCGGAACGACGTCGTAGAGAGAAGCTGAATGAGCGTTTTATTATTTTA  
AGGTCCTTAGTACCGTTCGTTACGAAAATGGATAAAGCATCGATACTTGTGATACAATAGAGTATGTGAAGCA  
GTTACGTAAGAAAGTTCAAGGATCTTGAAGCGGTGATCGTCACGCGGAAACCACAAAAAATGCAGATGAAAA  
GAGTGGTACAGCAACAGTGAAGGCGTTTTCCGGGAAGGGTAAGAGGAGAATGAAGAGTGCAGTGGAGGGA  
AGTATAGGCGGAGCACCAGCAAAGATCACCGCTCTCCACCTATGGATGAGGAAGTTTTGCAAGTGGAAAGTC  
TCAATCATCGAAAACGATGCACTGGTGGAGCTCCGGTGTCCGTACAAAGAAGGGTTGTTGTTAGATGTAATGC  
AAATGCTAAGGGAACTAAAAGTGGAAAGTTGTAGCAATCCAATCATCTTAACTGGCCTCTTATTGGCTGA  
GTTAAGAGCTAAGGTAAGAAGATATATATGGAAGGAAAGCAAGCATTTTGGAAAGTAAAAAGTCAATACA  
TCAGATAATCCCTAGAGCTAATTAA

> *StbHLH1-4*

ATGGAGATTATACAGCCTAATAGCCTGCAGTTACAAAACATGTTGCAGAATCCGTCCAGTCGGTTAAATGGA  
CTTATAGTCTTTTTGGCAATTTGTCCAAAACAAGGGGTGTTAATGTGGAGAGATGGATATTATAATGGAGCT  
ATAAAGACAAGGAAAACGTGCAGCCAATGGAAGTTACTGCTGAAGAAGCTTCTCTTCATAGAAGCCAACAA  
CTTAGAGAACTTTATGATTCACTTTCTGCCGGCGACTCAAATCCGCCGGCGAGAAGGCCGTCCGCAGCCTTATC  
GCCGGAGGATTTGACGGAATCTGAGTGGTTTTATCTCATGTGTGTTTCTTTCTTTTCTCCACCTATTGGATT

ACCAGGCAAGGCTTATTCAAAGAAACATCACATATGGATAATGGGTGCAAATGAGGTTGATAGCAAAGTCTT  
CTGTAGAGCTATTCTTGCTAAGAGTGCCCGCATACAGGTAATAAACTTTACCTGCAGACCCTTTGACTTATTA  
ATTTCCAATTACTGTCTGTTTGTATTCCTCTCTTGGACGGTGTAGTGGAAGTGGGAAGTACAGAAAGGGTTC  
AAGAAGACATTGGATTCATACATCATGTAAAAAGCTTCTTCAATGAGCCACAACAAGCTCAGCCACCAAAGCC  
AGCTTTATCTGAGCACTCCACTTCGGATCCCGCCGCCTTTTCGGAGCCACATTTTTACTCCAGCAATACTCCGTC  
ATCCGCTGGTATTTGTCCAGCGGATCAAGACGGTAGAATTGCTAGAGAAGAAGAAAATGAGGATGAGGATG  
ACGAAGAAGAAAATGATGAAGTTGAATTAGACTCGGATGGTATAGCAATTCAAAGTGTGCTGGGGCGGCTA  
ATCCTATAGCGGCTGAGGCTAGTGAGCTCATGCAGCTTGATATGTCTGAAACTATACGGCTCGGCTCGCCGGA  
TGATGGCTCTAATAATATGGATACTGATTTATATTTGGATGGTATTAGCCAAGCTGGAAATACGGCTGACTCTT  
TCAAAGCTGAGACTGCAATTAGTTGGGCTAACTTCCAAGACCTTCAACATTTAACAGGTGTCCCTAGTTATGAT  
GAATTATCACAAGAAGATGCACATTATTCTCAAACAGTTTCAGCTGTACTTGAACACCTCTCAAACACAAGTTC  
CAAATTTGCCTCTTCTACTACCATACTGGGCTCTATTTCTCCTGATTCAGCCCAATCCGCTTTCACATTATGGCCC  
ATCATTGTAGCCCAAATCCCTCCCACTGCCATCGCCAACACGGCGGCGACGGCAGTGGGACCAGCTCCCAGT  
GGCTGCTCAAAGCATACTATTCAGTGTCCCATTTCTCCACACTACTAAAAAATTACACCAACTACCTGAAGCTC  
TTTCTCAAAGTCACGAGACTCTGCGGCCGACTCTCAGCCGCAGCGTCTCGATTCCGCAAAGGATGTACGAT  
AAATAGTAGTACACAACAAGAAGAGACGAATGGGAACCATGTACTAGCGGAACGACGTCGTAGAGAGAAGC  
TGAATGAGCGTTTTATTATTTAAGGTCCTTAGTACCGTTCGTTACGAAAATGGATAAAGCATCGATACTTGGT  
GATACAATAGAGTATGTGAAGCAGTTACGTAAGAAAGTTCAGGATCTTGAAGCGCGTGATCGTCACGCGGAA  
ACCACAAAAAATGCAGATGAAAAGAATGGTACAACAATAGTGAAGGCATTTCCGGGGAAGGGTAAGAGGAA  
AATGAAGAGTACGGTGGAGGGAAGTATAGGCAGAGCACCGGCAAAGATAACGGTGTCTCCACCTATGGATG  
AAGAAGTTTTGCAAGTGGAAAGTCTCAATCATCGAAAACGATGCATTGGTGGAGCTCCGGTGTCCGTACAAAG  
AAGGGTTGTTGTTAGATGTAATGCAAATGCTAAGGGAAGTAAAGTGGAAAGTTGTAGCAATCCAATCATCTCT  
TAATACTGGCTTCTTATTTGCTGAGTTAAGAGCTAAGGTAAGAAGATATATATGGAAGGAAAGCAAGCATT  
TTGGAAGTGAAAAGTCAATACATCAGATAATCCCTAGAGCTAATTAA
