# Supplementary material for: Functional diversification of the potato R2R3 MYB anthocyanin activators AN1, MYBA1, and MYB113 and their interaction with basic helix-loop-helix cofactors
Source: J Exp Bot. 2016 Feb 16;67(8):2159–76. doi: 10.1093/jxb/erw014 (PMC4809278; doi:10.1093/jxb/erw014)
Supplement: Supplementary Data [file supp_erw014_Supplementary_Figures_S1_S8.pdf]

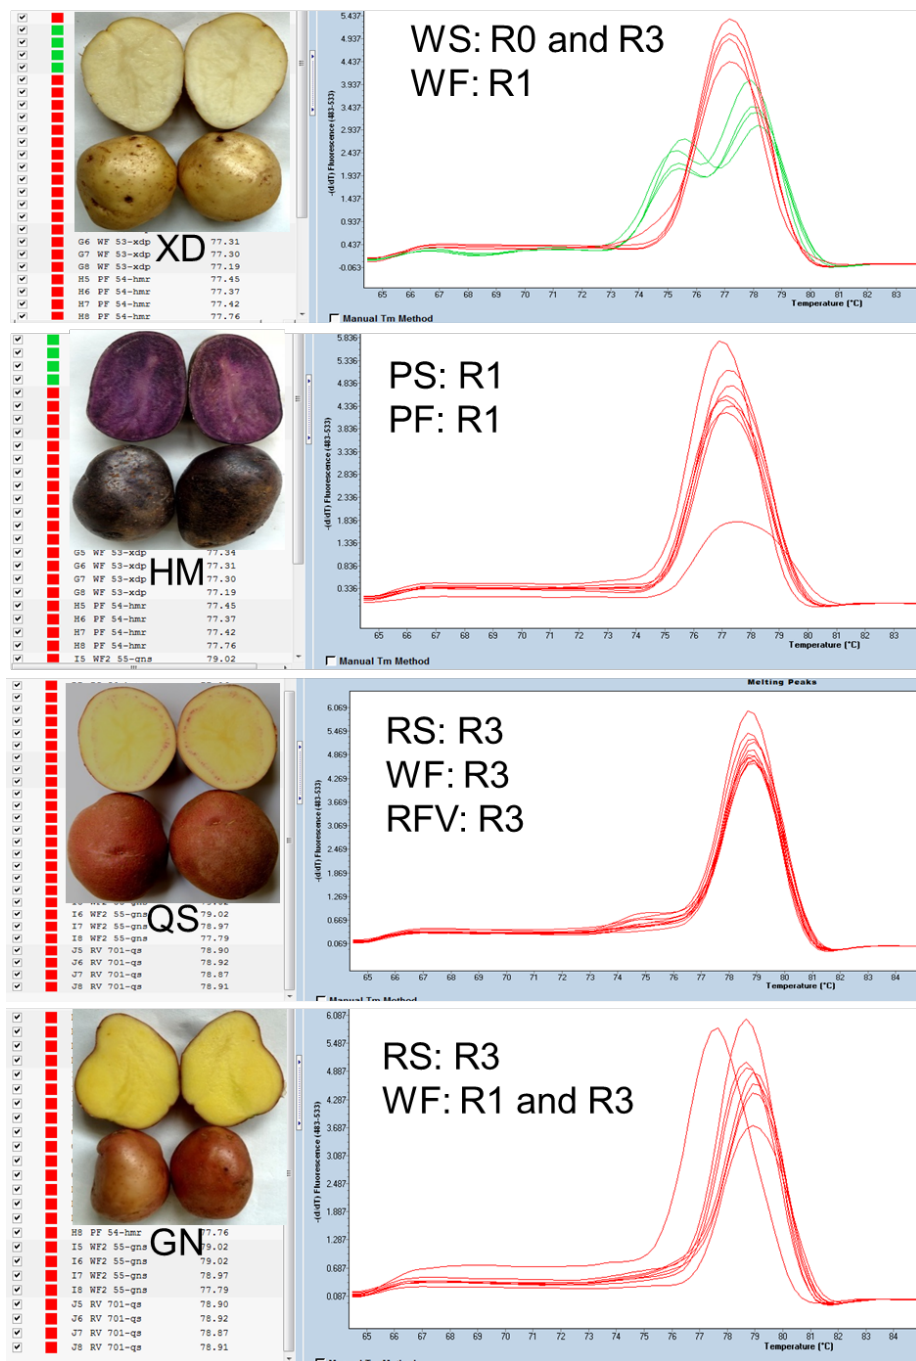

**Supplementary Fig. S1.** Different variants of *StANI* presented in skin, flesh and red vascular ring of four genotypes by qPCR melting curve analysis. A pair of primers (StAN1-5F/StAN1-6R) flanking R repeat region was used to identify variants. Green lines indicate two PCR products were detected, red lines indicate single PCR product.

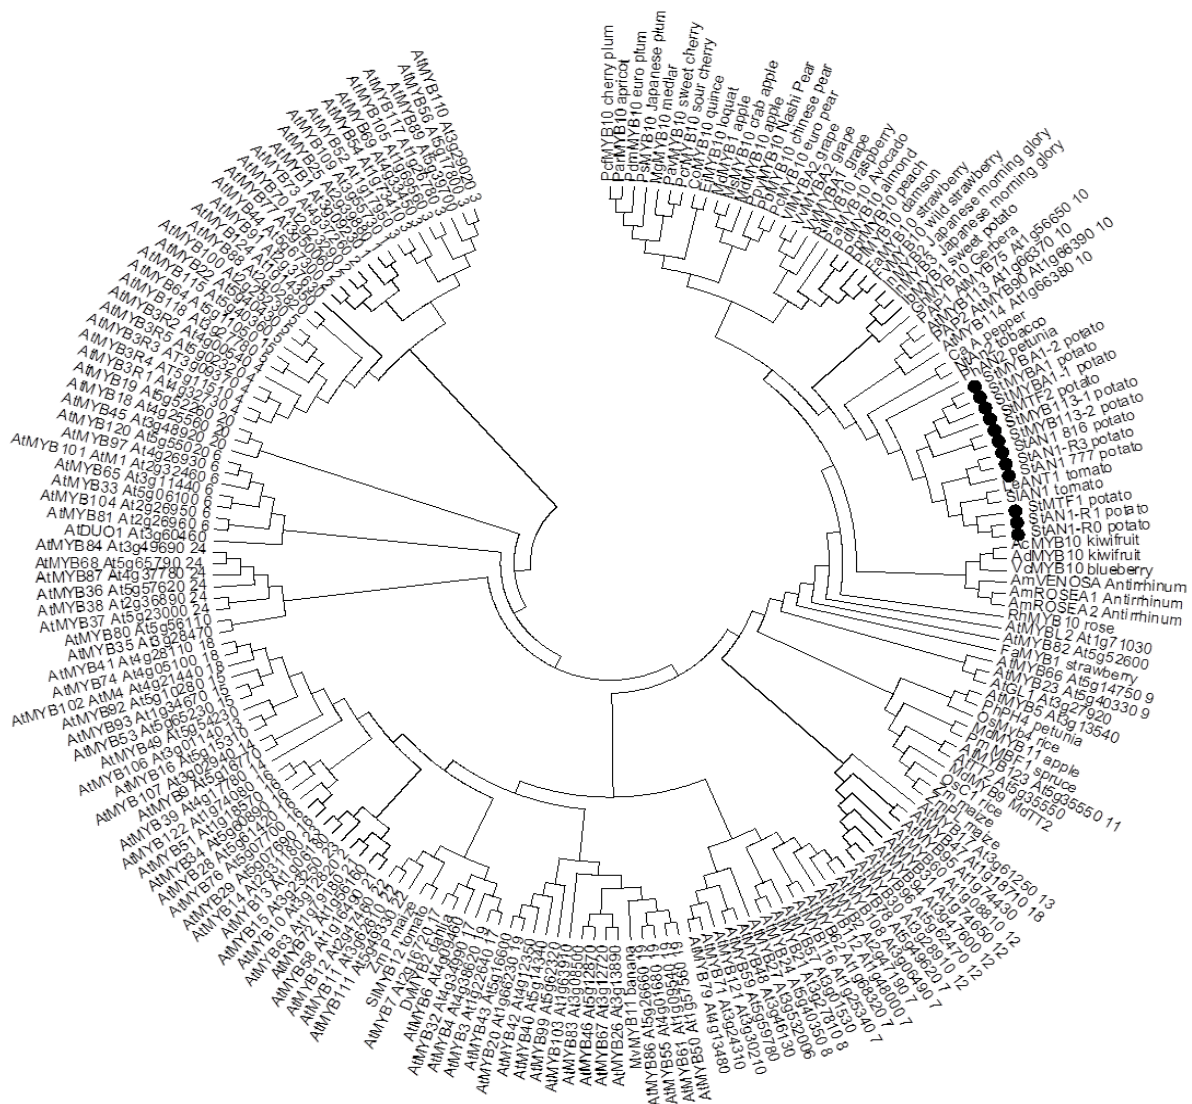

**Supplementary Fig. S2.** Phylogenetic relationship between Arabidopsis MYB transcription factors and anthocyanin-related MYBs of potato and other species. Potato *StAN1-R0*, *StAN1-R1*, *StAN1-R3*, *StMYBA1-1*, *StMYBA1-2*, *StMYB113-1*, *StMYB113-2* cluster within the anthocyanin MYB regulator subgroup.



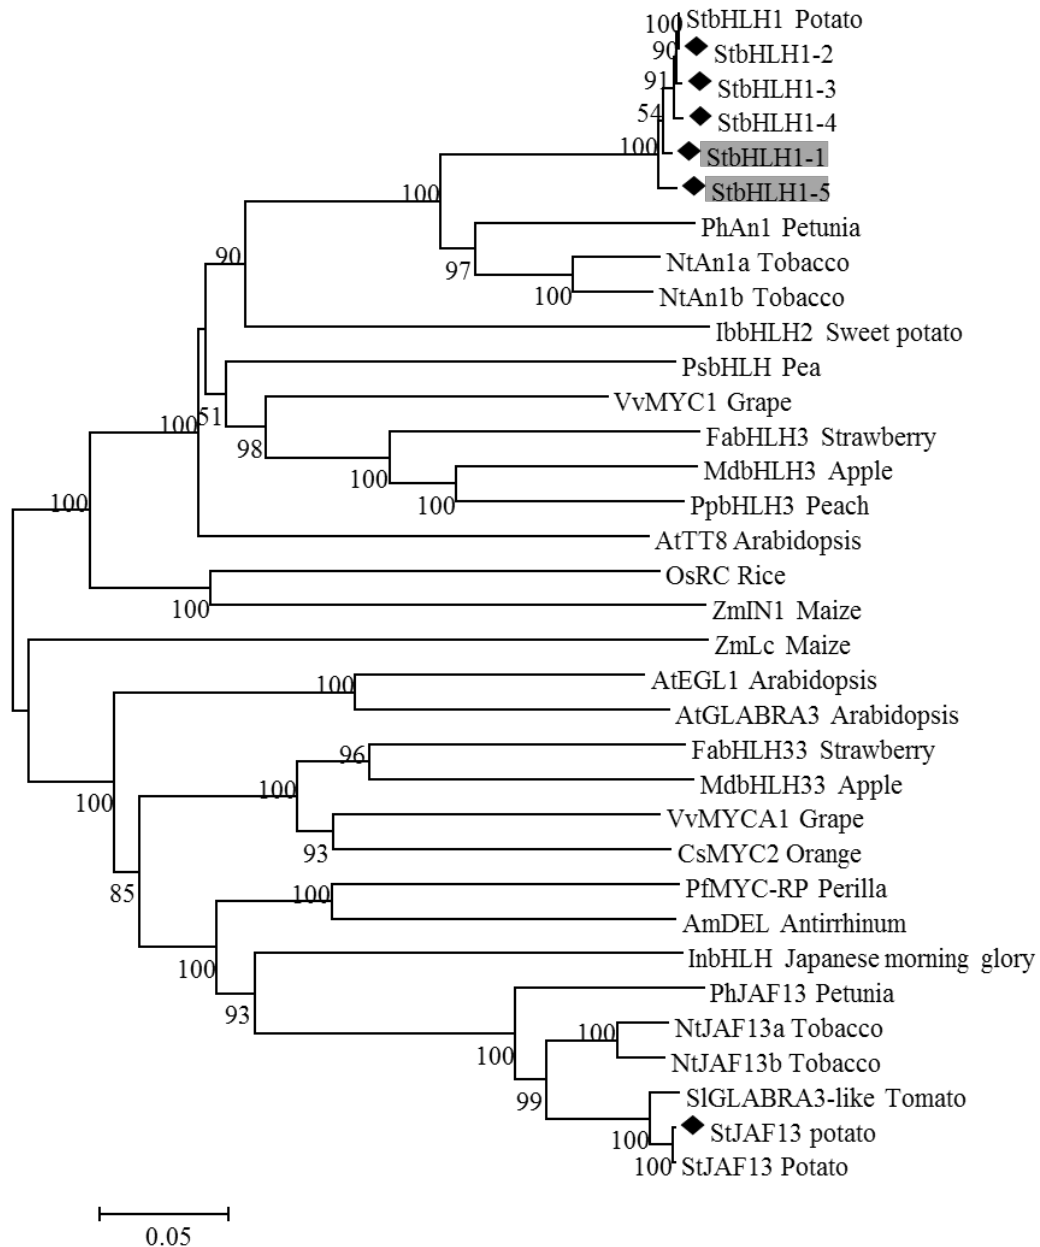

**Supplementary Fig. S4.** Phylogenetic relationship of anthocyanin-related *bHLH* genes of potato and other species. Sequences were aligned using Geneious v.6.1.6 (Drummond *et al.*, 2011) with a cost matrix of 65%, a gap open penalty of 12 and a gap extension penalty of 3. Phylogenetic and molecular evolutionary analysis was conducted using MEGA version 6.0 [the evolutionary history was inferred using the neighbour-joining method and 1000 bootstrap replicates, bootstrap values less than 50 are not shown], *StbHLH1-1*, *StbHLH1-2*, *StbHLH1-3*, *StbHLH1-4*, *StbHLH1-5* and *StJAF13* are indicated by black diamond. The non-functional *StbHLH1-1* and *StbHLH1-4* are indicated by grey box.

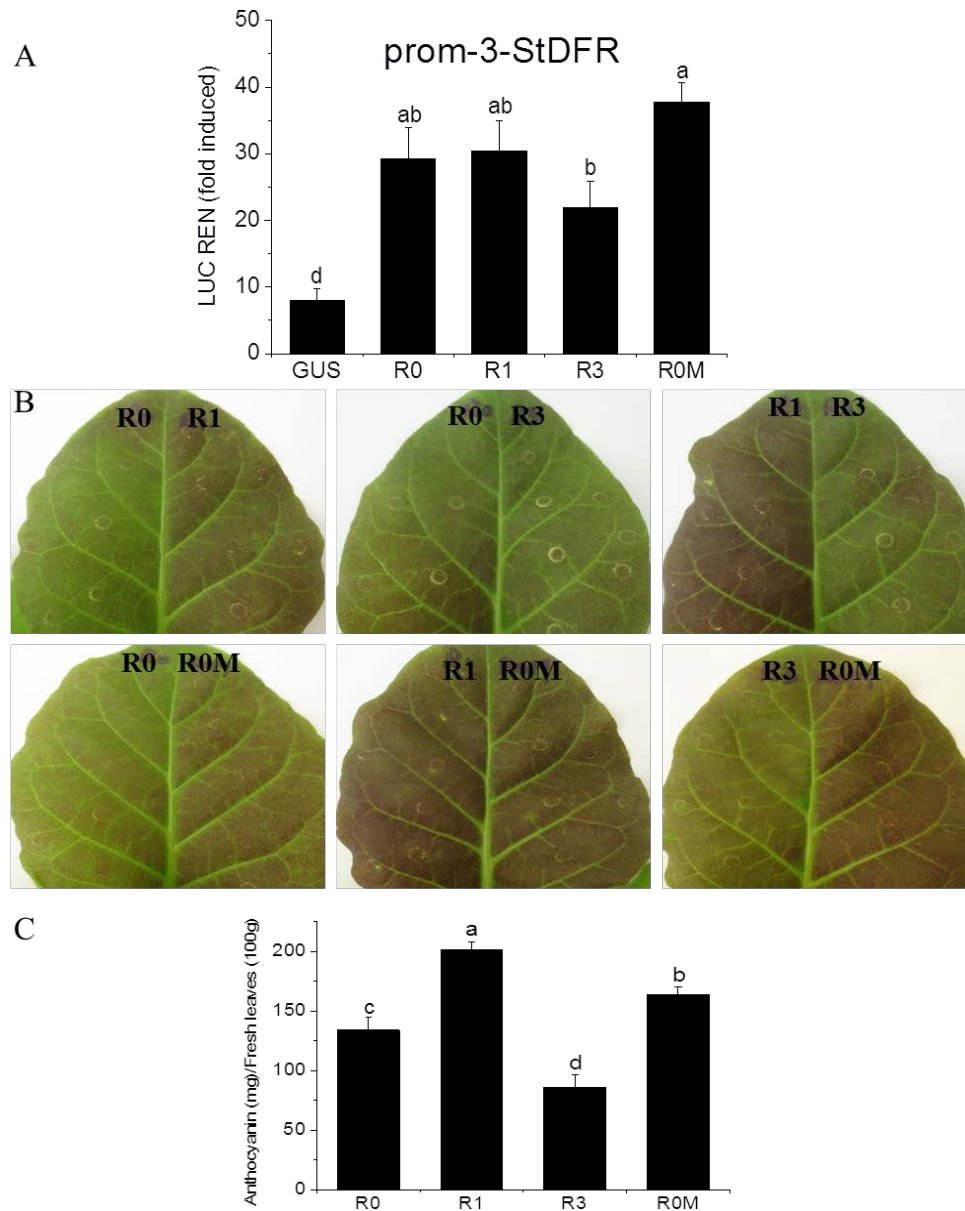

**Supplementary Fig. S5.** Transient expression assays to probe the function of *StANI-ROM*. (A) The activity of the *prom-3-StDFR* promoter affected by the *StANI-R0*, *StANI-R1*, *StANI-R3* and *StANI-ROM*. Error bars are the SE of three independent experiments with four replicate reactions. (B) Patches of anthocyanin production in tobacco leaves by *StANI-R0*, *StANI-R1*, *StANI-R3* and *StANI-ROM*. Pictures were taken at 4-d after infiltration. (C) Anthocyanin was extracted from patches described in (B), Error bars are the SE of three biological replicates. Statistical significance was determined by one-way ANOVA; significant differences between means (LSD,  $P < 0.05$ ) are indicated where letters (a, b, c, etc.) above the bar differ.

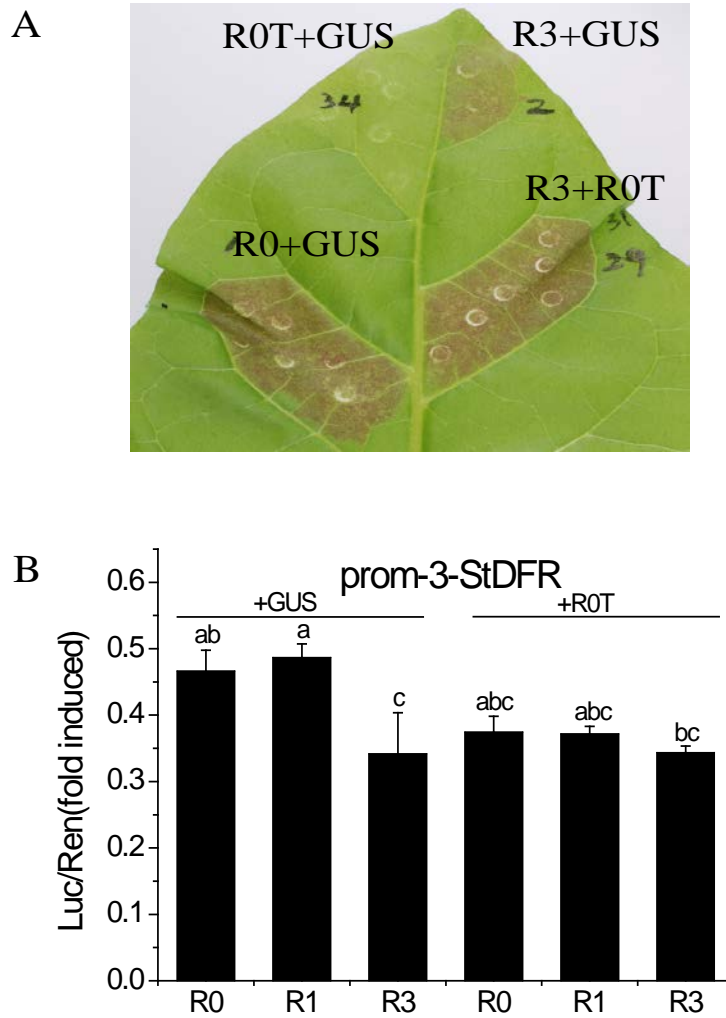

**Supplementary Fig. S6.** Transient expression assays to probe the function of *StANI-R0T*. (A) Patches of anthocyanin production in *NtANI RNAi* tobacco leaves by the combinations as shown. Pictures were taken at 4-d after infiltration. (B) The activity of the *prom-3-StDFR* promoter affected by the *StANI-R0*, *StANI-R1*, *StANI-R3* either combined with GUS or R0T. Error bars are the SE of three independent experiments with four replicate reactions. Statistical significance was determined by one-way ANOVA; significant differences between means (LSD,  $P < 0.05$ ) are indicated where letters (a, b, c, etc.) above the bar differ.

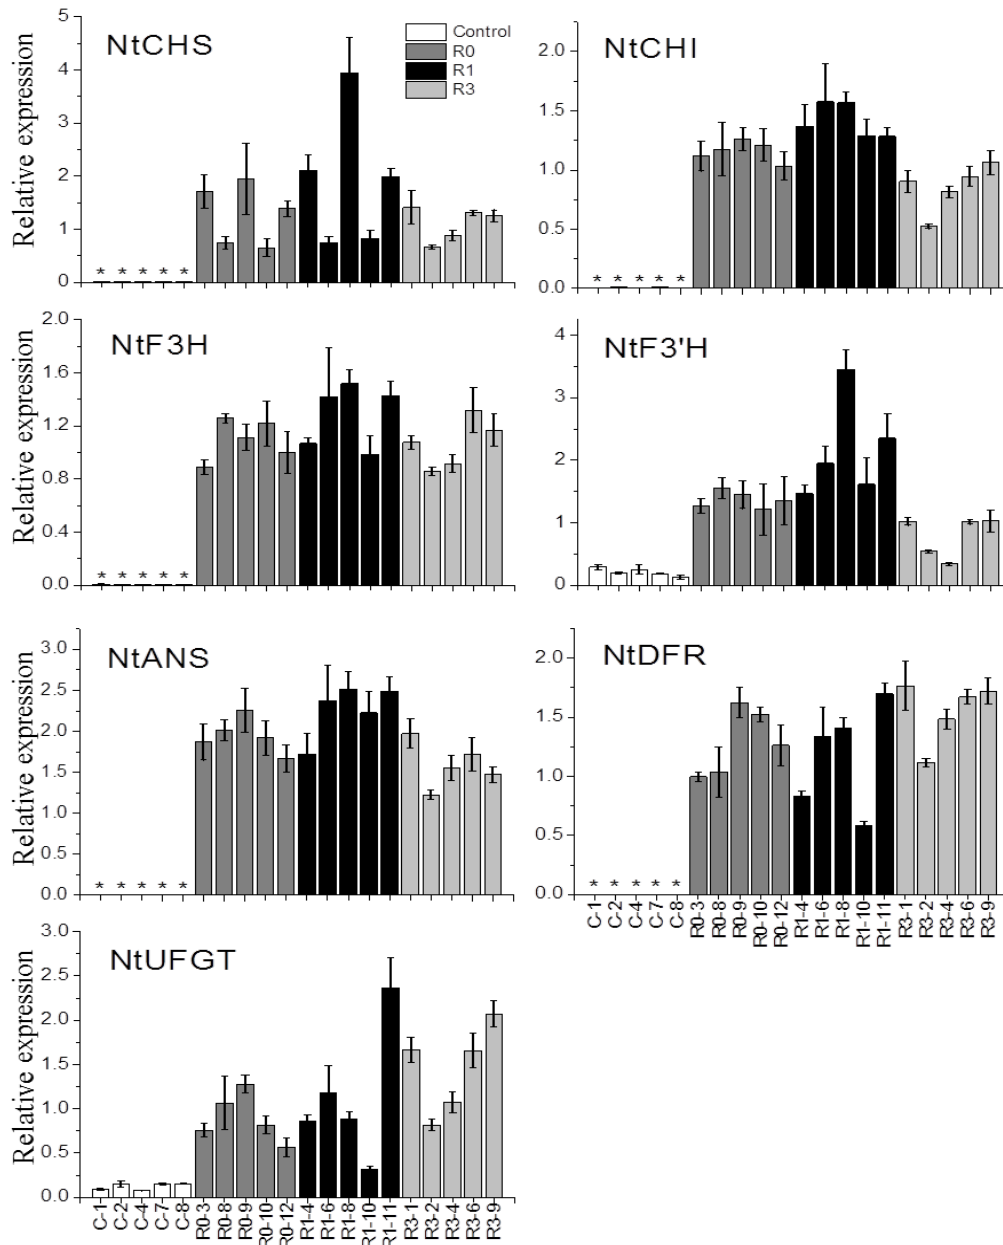

**Supplementary Fig. S7.** Quantitative analysis of transcript levels of anthocyanin biosynthetic genes in transgenic tobacco leaves carrying 35S:empty vector pSAK277 (Control) and overexpressing *StAN1-R0*, *StAN1-R1* and *StAN1-R3*. Error bars are the SE for four replicates per line. Statistical significance was determined by one-way ANOVA; significant differences between means (LSD,  $P < 0.05$ ) are indicated where letters (a, b, c, etc.) above the bar differ. Genotypes denoted by \* showed no detectable levels of expression.

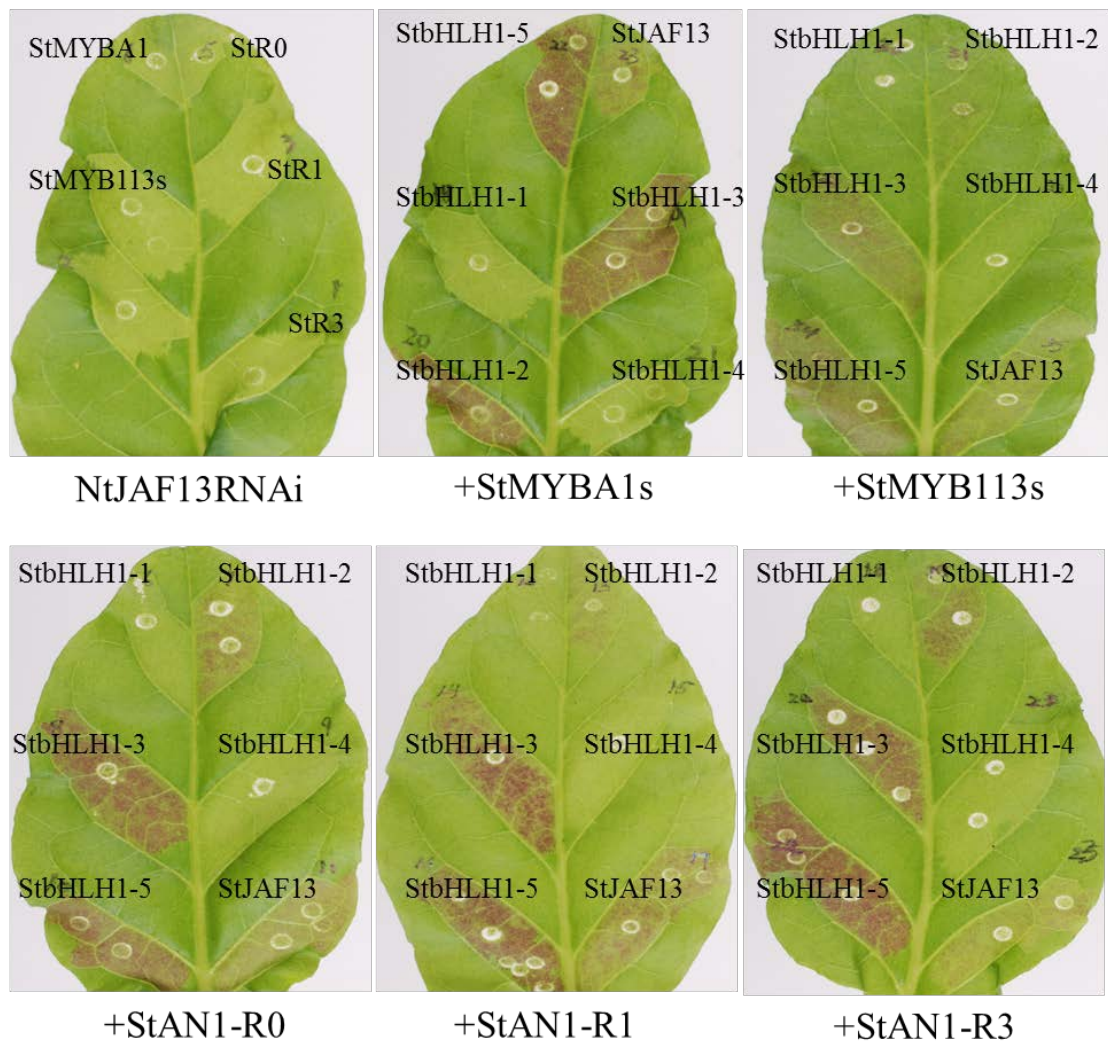

**Supplementary Fig. S8.** Patches of anthocyanin production in *NtJAF13* RNAi tobacco leaves by *StMYBA1s*, *StMYB113s*, *StAN1-R0*, *StAN1-R1*, *StAN1-R3* alone or combined with five variants of *StbHLH1* and *StJAF13*, respectively.
