# Supplementary material for: Functional diversification of the potato R2R3 MYB anthocyanin activators AN1, MYBA1, and MYB113 and their interaction with basic helix-loop-helix cofactors
Source: J Exp Bot. 2016 Feb 16;67(8):2159–76. doi: 10.1093/jxb/erw014 (PMC4809278; doi:10.1093/jxb/erw014)
Supplement: Supplementary Data [file supp_erw014_Supplementary_Table_S1.pdf]

**Table S1 Summary of missense mutations found with respect to *StbHLH1* (JX848660) sequence**

| Variants of bHLH1 | Nucleotide positions | Missense mutations                                               | Amino acid substitutions |
|-------------------|----------------------|------------------------------------------------------------------|--------------------------|
| StbHLH1-1         | 1589                 | G>deletion                                                       | G→V                      |
|                   | 1597-1599            | ATA>TAG                                                          | Stop codon               |
| StbHLH1-2         |                      | (same as StbHLH1 (JX848660))                                     |                          |
| StbHLH1-3         | 309                  | G>A                                                              | T→T                      |
|                   | 646                  | G>A                                                              | A→T                      |
|                   | 717                  | T>C                                                              | D→D                      |
|                   | 762-767              | TGAGGA>deletion                                                  | ED→ deletion             |
|                   | 853-867              | AATCCTATAGCGGCT>deletion                                         | AANPI→deletion           |
|                   | 887                  | C>A                                                              | P→Q                      |
|                   | 1065                 | T>A                                                              | P→P                      |
|                   | 1110                 | A>T                                                              | T→T                      |
| StbHLH1-4         | 478-527              | GTAATAAAACTTTACCTGCAGACCCTTTGA<br>CTTATTAATTTCCAATTATT>insertion | Stop codon               |
| StbHLH1-5         | 201                  | G>T                                                              | S→S                      |
|                   | 291                  | G>A                                                              | L→L                      |
|                   | 315                  | C>T                                                              | S→S                      |
|                   | 587                  | A>C                                                              | Q→P                      |
|                   | 717                  | T>C                                                              | D→D                      |
|                   | 730                  | G>A                                                              | G→R                      |
|                   | 753-776              | GGATGAGGATGAGGACGAGGATGA>deletion                                | EDEDEDED→<br>deletion    |
|                   | 817                  | A>G                                                              | N→D                      |
|                   | 887                  | C>A                                                              | P→Q                      |
|                   | 1174                 | A>C                                                              | M→L                      |
|                   | 1264                 | C>G                                                              | H→D                      |
|                   | 1360                 | C>T                                                              | L→L                      |
|                   | 1365                 | T>A                                                              | P→P                      |
|                   | 1393                 | T>G                                                              | S→A                      |
|                   | 1404                 | C>T                                                              | D→D                      |
|                   | 1419                 | G>A                                                              | A→A                      |
|                   | 1688                 | A>G                                                              | N→S                      |
|                   | 1696                 | A>G                                                              | T→A                      |
|                   | 1710                 | A>G                                                              | A→A                      |
|                   | 1714                 | C>T                                                              | P→S                      |
|                   | 1733                 | A>G                                                              | K→R                      |
|                   | 1743-1744            | TA>CG                                                            | ST→SA                    |
|                   | 1765                 | A>G                                                              | R→G                      |
|                   | 1773                 | G>A                                                              | P→P                      |
|                   | 1782                 | A>C                                                              | I→I                      |
|                   | 1785                 | G>C                                                              | T→T                      |
|                   | 1787                 | T>C                                                              | V→A                      |
|                   | 1806                 | A>G                                                              | E→E                      |
|                   | 1827                 | C>G                                                              | V→V                      |
|                   | 1849                 | T>C                                                              | L→L                      |
|                   | 1887                 | G>A                                                              | L→L                      |
|                   | 1917                 | T>A                                                              | L→L                      |
|                   | 1960                 | T>C                                                              | F→L                      |
|                   | 1968                 | T>G                                                              | F→L                      |
